# Supplementary material
Source: publisher figshare collection journal article supplement (https://gsajournals.figshare.com/ndownloader/files/17412938)
Supplement: Supplementary file 1 [file 17412938]

## Sheet: Sheet2
Table S8 Annotations of the 155 significant SNPs identified by environmental association
SNPs_chr	SNPs_pos	SNP_ID	SNP_type	Ass_variables	Gene_chr	Gene_start	Gene_end	Gene_id	Distance_from_SNP_to_gene_(bp)	Gene_function
chr2H	248555805	SCRI_RS_236995	noncoding	1, 8, IC3, elevation	chr2H	248059687	248063992	NA	-491813	NA
chr2H	248555440	SCRI_RS_206358	noncoding	6, 11	chr2H	248059687	248063992	NA	-491448	NA
chr5H	195772324	11_10856	noncoding	13, 16, IC3	chr5H	195673147	195673612	NA	-98712	NA
chr3H	633641840	11_10867	noncoding	14, 17	chr3H	633599411	633601769	NA	-40071	NA
chr3H	676490418	12_20198	noncoding	14, 17	chr3H	676460774	676461564	NA	-28854	NA
chr7H	14909880	SCRI_RS_155121	noncoding	14	chr7H	14857110	14891927	NA	-17953	NA
chr5H	299604103	SCRI_RS_167575	noncoding	13	chr5H	299588493	299589261	NA	-14842	NA
chrUn	92767626	SCRI_RS_126069	noncoding	7	chrUn	92751736	92757413	NA	-10213	NA
chr3H	679786090	12_30960	noncoding	18	chr3H	679778801	679779084	NA	-7006	NA
chrUn	93085273	11_20868	noncoding	Longitude	chrUn	93079163	93080622	HORVU0Hr1G017760	-4651	Remorin family protein
chr1H	274488	SCRI_RS_180989	nonsyn.	13, 16, 3, IC3, Latitude	chr1H	272405	275627	HORVU1Hr1G000110	0	unknown protein
chr1H	5770204	12_11011	syn.	Longitude	chr1H	5769471	5771081	HORVU1Hr1G002840	0	actin 7
chr1H	5770474	12_30933	noncoding	6, 11, IC1	chr1H	5769471	5771081	HORVU1Hr1G002840	0	actin 7
chr1H	14371313	SCRI_RS_124926	syn.	18	chr1H	14369285	14375231	HORVU1Hr1G007310	0	Calcium-transporting ATPase 1
chr1H	17566590	SCRI_RS_235243	nonsyn.	14	chr1H	17566210	17571908	HORVU1Hr1G008120	0	dehydroascorbate reductase 2
chr1H	103520348	SCRI_RS_149971	syn.	Longitude	chr1H	103515685	103523648	HORVU1Hr1G023460	0	gibberellin 2-oxidase 6
chr1H	109055279	12_30436	nonsyn.	12, 14, 17	chr1H	109045586	109055540	HORVU1Hr1G024240	0	Acyl-CoA dehydrogenase
chr1H	352305893	11_21357	syn.	2	chr1H	352304715	352309092	HORVU1Hr1G047680	0	methionine aminopeptidase 1A
chr1H	365007316	11_20912	noncoding	12, 17	chr1H	365007167	365008215	HORVU1Hr1G051120	0	26S proteasome non-ATPase regulatory subunit 13 homolog B
chr1H	379332362	SCRI_RS_109060	syn.	18	chr1H	379331606	379332912	HORVU1Hr1G051120	0	26S proteasome non-ATPase regulatory subunit 13 homolog B
chr1H	380767247	12_30750	syn.	14, 17	chr1H	380766230	380768535	HORVU1Hr1G051350	0	ADP-ribosylation factor 1
chr1H	406340493	12_10105	noncoding	12, 13, 16, 18, IC3	chr1H	406338101	406342417	HORVU1Hr1G055440	0	Nucleoside diphosphate kinase family protein
chr1H	451118381	12_10313	syn.	elevation	chr1H	451113096	451119392	HORVU1Hr1G062650	0	Coatomer subunit delta-1
chr1H	451731100	11_20432	syn.	16, 18, IC3	chr1H	451729555	451734289	HORVU1Hr1G062900	0	Argininosuccinate synthase
chr1H	506611529	SCRI_RS_231869	nonsyn.	13, 16, 18, IC3	chr1H	506606290	506611986	HORVU1Hr1G074060	0	serine/threonine protein kinase 2
chr1H	506769928	SCRI_RS_177788	syn.	18	chr1H	506767744	506770889	HORVU1Hr1G074130	0	NC domain-containing protein-related
chr1H	509511424	11_21373	nonsyn.	14, 17	chr1H	509508850	509513246	HORVU1Hr1G074940	0	Tubby-like F-box protein 8
chr1H	517251616	12_11173	syn.	11, 4, 6, Latitude	chr1H	517244196	517252345	HORVU1Hr1G077430	0	Protein kinase family protein
chr1H	520008962	12_20187	noncoding	elevation	chr1H	520005829	520012019	HORVU1Hr1G078350	0	Phosphoethanolamine N-methyltransferase 1
chr1H	520489712	11_20909	syn.	elevation	chr1H	520489407	520491407	HORVU1Hr1G078500	0	unknown function
chr1H	536427202	SCRI_RS_127646	syn.	3	chr1H	536425916	536430723	HORVU1Hr1G085880	0	Ninja-family protein
chr2H	6193157	12_21415	noncoding	Longitude	chr2H	6186815	6193406	HORVU2Hr1G002710	0	Integral membrane protein hemolysin-III homolog
chr2H	9181389	SCRI_RS_146997	syn.	Latitude	chr2H	9165619	9181776	HORVU2Hr1G003970	0	BEST Arabidopsis thaliana protein match is: glycine-rich protein
chr2H	23189369	SCRI_RS_198643	syn.	3	chr2H	23187649	23191402	HORVU2Hr1G011560	0	WD repeat-containing protein 25
chr2H	45633382	SCRI_RS_120182	syn.	14, 17	chr2H	45631792	45634058	HORVU2Hr1G017920	0	Actin-related protein 2/3 complex subunit 5A
chr2H	122767846	12_10927	syn.	6, 9, IC1, 11	chr2H	122765367	122772118	HORVU2Hr1G032130	0	Nuclear transcription factor Y subunit A-5
chr2H	132767421	11_10997	noncoding	18, Longitude	chr2H	132764653	132767703	HORVU2Hr1G033470	0	Carbohydrate-binding X8 domain superfamily protein
chr2H	175053530	SCRI_RS_109192	nonsyn.	10, 18, elevation	chr2H	175052888	175054323	HORVU2Hr1G037940	0	40S ribosomal protein S13-1
chr2H	184569149	SCRI_RS_130072	noncoding	1, 8, IC3, elevation	chr2H	184566818	184570438	HORVU2Hr1G038830	0	Ferredoxin--NADP reductase
chr2H	238166195	12_10474	noncoding	IC3, elevation	chr2H	238164698	238166289	HORVU2Hr1G045490	0	undescribed protein
chr2H	239095743	SCRI_RS_55840	noncoding	8, IC3, elevation	chr2H	239093674	239096034	HORVU2Hr1G045590	0	unknown function
chr2H	252287919	SCRI_RS_160277	syn.	8, IC3	chr2H	252266491	252287970	HORVU2Hr1G046680	0	tRNA wybutosine-synthesizing protein 2/3/4
chr2H	253188606	12_10099	noncoding	IC3, elevation	chr2H	253186566	253201342	HORVU2Hr1G046740	0	Exonuclease 3'-5' domain-containing protein 2
chr2H	404619507	SCRI_RS_157207	nonsyn.	6, 11	chr2H	404615405	404620789	HORVU2Hr1G060560	0	Leucine-rich receptor-like protein kinase family protein
chr2H	579637927	SCRI_RS_143213	syn.	14	chr2H	579636005	579639616	HORVU2Hr1G080070	0	Aldose 1-epimerase
chr2H	609148242	SCRI_RS_189408	nonsyn.	12, 13, 16, IC3	chr2H	609147387	609149605	HORVU2Hr1G083970	0	Restriction endonuclease, type II-like superfamily protein
chr2H	624659037	SCRI_RS_156871	syn.	14, 17, 19, IC2	chr2H	624655851	624662418	HORVU2Hr1G086820	0	Gamma-tubulin complex component 2
chr2H	635294514	12_30696	syn.	2	chr2H	635288295	635295021	HORVU2Hr1G088780	0	RING/U-box superfamily protein
chr2H	676764753	12_10649	noncoding	14, 17	chr2H	676762272	676775967	HORVU2Hr1G096760	0	Acyl-CoA thioesterase family protein
chr2H	677197362	11_10138	noncoding	14, 17	chr2H	677193839	677199105	HORVU2Hr1G096970	0	AT-hook motif nuclear-localized protein 1
chr2H	682609938	SCRI_RS_196270	nonsyn.	Longitude	chr2H	682607368	682610470	HORVU2Hr1G098380	0	SMR domain-containing protein
chr2H	683621802	SCRI_RS_150494	noncoding	3, 4	chr2H	683620394	683623035	HORVU2Hr1G098550	0	Peptidyl-prolyl cis-trans isomerase D
chr2H	685385501	12_30200	noncoding	Longitude	chr2H	685376740	685385984	HORVU2Hr1G098860	0	unknown function
chr2H	685490222	11_10398	noncoding	Longitude	chr2H	685489979	685496458	HORVU2Hr1G098880	0	Succinylornithine transaminase/acetylornithine aminotransferase
chr2H	687238985	11_11346	noncoding	Longitude	chr2H	687237929	687242834	HORVU2Hr1G099270	0	Leucine-rich repeat receptor-like protein kinase family protein
chr2H	699187331	11_20955	nonsyn.	19	chr2H	699184531	699188117	HORVU2Hr1G103100	0	Signal recognition particle 14 kDa protein
chr2H	758851026	11_10085	noncoding	19, 3	chr2H	758847651	758851123	HORVU2Hr1G124650	0	Inorganic pyrophosphatase
chr2H	759162859	SCRI_RS_142982	nonsyn.	19	chr2H	759161848	759163088	HORVU2Hr1G124800	0	Thioredoxin superfamily protein
chr3H	17409756	11_20742	syn.	12, 18	chr3H	17404853	17410516	HORVU3Hr1G007190	0	sugar transporter 9
chr3H	54950033	11_10601	noncoding	12, 13, 16, 18, IC3	chr3H	54949488	54951790	HORVU3Hr1G019510	0	Zinc finger CCCH domain-containing protein 2
chr3H	142551916	11_10380	noncoding	6	chr3H	142551260	142552617	HORVU3Hr1G030150	0	Cold induced 16
chr3H	485951280	SCRI_RS_6793	nonsyn.	Longitude	chr3H	485950088	485951352	HORVU3Hr1G063630	0	N-terminal protein myristoylation
chr3H	594031634	SCRI_RS_240090	syn.	3, Latitude	chr3H	594030352	594032146	HORVU3Hr1G081230	0	expansin A1
chr3H	603092865	12_10210	syn.	14, 17	chr3H	603091365	603094015	HORVU3Hr1G083360	0	Fructose-1,6-bisphosphatase class 1
chr3H	634853591	11_20650	nonsyn.	14, 17	chr3H	634851870	634856352	HORVU3Hr1G091200	0	F-box family protein
chr3H	637942608	11_20662	noncoding	9	chr3H	637942272	637944919	HORVU3Hr1G092420	0	unknown function
chr3H	659541006	SCRI_RS_201224	noncoding	12	chr3H	659538875	659547026	HORVU3Hr1G098670	0	Potassium transporter family protein
chr3H	664600963	SCRI_RS_144559	syn.	Longitude	chr3H	664600607	664603904	HORVU3Hr1G102030	0	hydroxyproline-rich glycoprotein family protein
chr4H	1101731	SCRI_RS_236981	syn.	14, 17	chr4H	1100186	1104760	HORVU4Hr1G000620	0	ATP binding cassette subfamily B1
chr4H	8809377	SCRI_RS_220110	syn.	14, 17	chr4H	8808439	8815115	HORVU4Hr1G003930	0	Serine/threonine protein phosphatase 2A 57 kDa regulatory subunit B' alpha isoform
chr4H	15304563	11_20210	syn.	14	chr4H	15304129	15308120	HORVU4Hr1G006530	0	beta glucosidase 43
chr4H	53045806	12_31414	noncoding	5	chr4H	53045571	53051483	HORVU4Hr1G014490	0	ER membrane protein complex subunit 10
chr4H	53723225	SCRI_RS_110052	noncoding	5, 12, 14, 17, 18	chr4H	53722874	53730617	HORVU4Hr1G014540	0	Protein ApaG
chr4H	63865064	11_10756	syn.	14, 17	chr4H	63864056	63865466	HORVU4Hr1G015930	0	receptor kinase 2
chr4H	83229373	SCRI_RS_130686	nonsyn.	IC2	chr4H	83225892	83232315	HORVU4Hr1G018330	0	Transmembrane 9 superfamily member 1
chr4H	463076615	SCRI_RS_157396	syn.	3, 8, 14, 17, Latitude	chr4H	463075857	463077315	HORVU4Hr1G055220	0	Abscisic acid receptor PYR1
chr4H	471656963	11_10881	noncoding	6	chr4H	471656802	471658804	HORVU4Hr1G056210	0	Protein phosphatase 2C family protein
chr4H	581788124	11_10309	noncoding	elevation	chr4H	581786655	581788589	HORVU4Hr1G071730	0	Inositol-3-phosphate synthase
chr4H	603360721	12_20825	noncoding	3	chr4H	603352523	603373225	HORVU4Hr1G077220	0	Phosphoinositide phosphatase family protein
chr4H	641609883	SCRI_RS_188943	syn.	14, 17, IC2	chr4H	641608353	641613003	HORVU4Hr1G089090	0	Chaperone protein DnaK
chr5H	12036275	SCRI_RS_160739	nonsyn.	Longitude	chr5H	12035769	12041522	HORVU5Hr1G006720	0	OJ000126_13.6 protein
chr5H	40247647	SCRI_RS_145348	syn.	Longitude	chr5H	40247242	40249059	HORVU5Hr1G012960	0	F-box and associated interaction domains-containing protein
chr5H	270952748	12_30408	noncoding	13, 16, 18, IC3	chr5H	270952568	270954737	HORVU5Hr1G037660	0	amino acid permease 3
chr5H	288729756	SCRI_RS_150023	nonsyn.	3	chr5H	288729063	288731086	HORVU5Hr1G039660	0	unknown function
chr5H	292644773	SCRI_RS_237910	noncoding	3	chr5H	292644563	292650756	HORVU5Hr1G040000	0	Tubby-like F-box protein 14
chr5H	408380006	12_10306	nonsyn.	13, 16, 18, IC3	chr5H	408374621	408380719	HORVU5Hr1G052230	0	SEC14 cytosolic factor
chr5H	409578338	12_11512	noncoding	19	chr5H	409578284	409584024	HORVU5Hr1G052320	0	2-phosphoglycolate phosphatase 2
chr5H	445240245	11_20370	noncoding	14, 17	chr5H	445240143	445243786	HORVU5Hr1G056860	0	unknown function
chr5H	480702479	SCRI_RS_145361	noncoding	13, 16, 18	chr5H	480702467	480706399	HORVU5Hr1G061480	0	FBD-associated F-box protein
chr5H	527152265	11_11355	noncoding	3, Latitude	chr5H	527151534	527162990	HORVU5Hr1G070160	0	Glycogen debranching enzyme
chr5H	547115792	11_11473	noncoding	12, 13, 16, 18, IC3	chr5H	547114255	547116226	HORVU5Hr1G075420	0	60S ribosomal protein L32-1
chr5H	548710047	SCRI_RS_4923	syn.	13, 16, 18, IC3	chr5H	548707497	548712288	HORVU5Hr1G075960	0	Ankyrin repeat family protein
chr5H	557858076	SCRI_RS_143508	syn.	18	chr5H	557857057	557860959	HORVU5Hr1G079730	0	Ubiquitin carboxyl-terminal hydrolase 2
chr5H	568918986	SCRI_RS_119301	nonsyn.	14, 17	chr5H	568918328	568920481	HORVU5Hr1G082990	0	1-phosphatidylinositol phosphodiesterase
chr5H	570951899	12_30619	syn.	14, 17	chr5H	570946250	570952771	HORVU5Hr1G084010	0	synaptotagmin A
chr5H	581494672	SCRI_RS_199964	syn.	9	chr5H	581486704	581494757	HORVU5Hr1G088350	0	phosphate transporter 4; 5
chr5H	587050399	SCRI_RS_212890	syn.	14, 17	chr5H	587046084	587051335	HORVU5Hr1G091750	0	Methionine import ATP-binding protein MetN
chr5H	595411192	SCRI_RS_130992	nonsyn.	14, 17, IC2	chr5H	595410338	595412607	HORVU5Hr1G094400	0	unknown function
chr5H	598560068	12_30867	nonsyn.	14, 17, 7, IC2	chr5H	598558007	598563926	HORVU5Hr1G095530	0	phytochrome C
chr5H	599128110	12_30930	noncoding	3	chr5H	599122940	599133084	HORVU5Hr1G095630	0	MADS-box transcription factor 14
chr5H	607080381	SCRI_RS_196175	syn.	Longitude	chr5H	607080099	607082067	HORVU5Hr1G098340	0	30S ribosomal protein S9
chr5H	609154093	11_10658	nonsyn.	15	chr5H	609150170	609154223	HORVU5Hr1G098960	0	tubulin alpha-4 chain
chr5H	622126190	SCRI_RS_172379	syn.	19	chr5H	622123928	622127221	HORVU5Hr1G105750	0	PITH domain-containing protein
chr5H	635986245	SCRI_RS_237478	nonsyn.	Latitude	chr5H	635984714	635988742	HORVU5Hr1G111360	0	HIT zinc finger ; PAPA-1-like conserved region
chr5H	639727265	SCRI_RS_122949	noncoding	19, 3, Latitude	chr5H	639725960	639785939	HORVU5Hr1G112560	0	Chloroplast-targeted copper chaperone protein
chr5H	644821403	SCRI_RS_155101	nonsyn.	14, 17	chr5H	644821174	644825570	HORVU5Hr1G114850	0	Protein kinase superfamily protein
chr5H	645846268	SCRI_RS_50995	syn.	elevation	chr5H	645843045	645850270	HORVU5Hr1G115160	0	Anthranilate synthase component 1
chr5H	650946777	SCRI_RS_173687	noncoding	14	chr5H	650944271	650946995	HORVU5Hr1G117600	0	4-hydroxybenzoate octaprenyltransferase
chr5H	653922698	SCRI_RS_186984	syn.	19, 3	chr5H	653920273	653924776	HORVU5Hr1G118870	0	Disease resistance protein
chr5H	653924639	SCRI_RS_8410	noncoding	19	chr5H	653920273	653924776	HORVU5Hr1G118870	0	Disease resistance protein
chr6H	16583737	SCRI_RS_213960	syn.	14, 17	chr6H	16583293	16586920	HORVU6Hr1G009280	0	copper ion transmembrane transporters
chr6H	17924349	12_30603	syn.	18, elevation	chr6H	17923660	17931664	HORVU6Hr1G010050	0	Protein kinase superfamily protein
chr6H	24329908	12_31485	nonsyn.	19	chr6H	24329735	24334228	HORVU6Hr1G012440	0	unknown function
chr6H	152364422	SCRI_RS_11588	syn.	18	chr6H	152360804	152371129	HORVU6Hr1G033430	0	Outer envelope protein 80, chloroplastic
chr6H	374867096	SCRI_RS_137464	syn.	8	chr6H	374866560	374869556	HORVU6Hr1G057630	0	Two-component response regulator-like PRR1
chr6H	397267547	SCRI_RS_192489	nonsyn.	elevation	chr6H	397263110	397269309	HORVU6Hr1G060020	0	Endosomal targeting BRO1-like domain-containing protein
chr6H	425269533	SCRI_RS_211289	syn.	IC1	chr6H	425269012	425270632	HORVU6Hr1G063180	0	expansin B4
chr6H	470879114	12_30637	nonsyn.	14, 17	chr6H	470878781	470882052	HORVU6Hr1G067840	0	ADP-ribosylation factor 1
chr6H	507569812	11_20784	syn.	14, 17	chr6H	507567397	507570155	HORVU6Hr1G073180	0	methyltransferase type 11
chr6H	512160253	12_30939	noncoding	1, 10, 11, 6, 9, elevation	chr6H	512158866	512162569	HORVU6Hr1G074030	0	glutamine synthetase 1; 4
chr6H	541271579	SCRI_RS_200907	noncoding	14, 17, IC2	chr6H	541271291	541274734	HORVU6Hr1G080290	0	Transcription factor TFIIIB component B''
chr6H	554766878	SCRI_RS_144448	noncoding	16	chr6H	554763403	554767114	HORVU6Hr1G084430	0	Autophagy-related protein 18
chr6H	563076161	SCRI_RS_169022	noncoding	14, 17	chr6H	563075980	563077160	HORVU6Hr1G087070	0	Peroxidase superfamily protein
chr7H	63748630	11_10726	noncoding	1, 11	chr7H	63745344	63749513	HORVU7Hr1G031320	0	Serine/arginine-rich splicing factor 7
chr7H	66194480	SCRI_RS_219349	nonsyn.	8	chr7H	66192175	66195110	HORVU7Hr1G032330	0	pectinesterase family protein
chr7H	66410739	12_30576	noncoding	5, 10	chr7H	66410504	66414390	HORVU7Hr1G032420	0	Transcription factor bHLH82
chr7H	86005304	SCRI_RS_236651	noncoding	4	chr7H	86005091	86009987	HORVU7Hr1G036690	0	Serine/threonine-protein phosphatase 2A activator
chr7H	240518944	11_10394	noncoding	4, 7, Longitude	chr7H	240513197	240531374	HORVU7Hr1G056770	0	L-threonine 3-dehydrogenase
chr7H	435470781	SCRI_RS_189377	noncoding	5	chr7H	435469555	435471602	HORVU7Hr1G075250	0	40S ribosomal protein S13-1
chr7H	440745793	11_11219	nonsyn.	11, 6, IC1, Longitude	chr7H	440745311	440747055	HORVU7Hr1G075760	0	L-gulonolactone oxidase 2
chr7H	448912368	11_10534	syn.	4, 7	chr7H	448907242	448912851	HORVU7Hr1G076780	0	Poly(rC)-binding protein 2
chr7H	481655599	12_30565	noncoding	4	chr7H	481655270	481658305	HORVU7Hr1G080990	0	Sec-independent protein translocase protein TatA
chr7H	525456145	SCRI_RS_235888	syn.	Longitude	chr7H	525453903	525458818	HORVU7Hr1G087210	0	Transmembrane 9 superfamily member 7
chr7H	537951457	11_10143	noncoding	Longitude	chr7H	537951249	537953582	HORVU7Hr1G088580	0	40S ribosomal protein S24-2
chr7H	538394571	SCRI_RS_149650	syn.	Longitude	chr7H	538394480	538400742	HORVU7Hr1G088630	0	ABC transporter G family member 42
chr7H	570360065	SCRI_RS_4562	syn.	11, 14, 15, 3, IC1, Latitude	chr7H	570358688	570360660	HORVU7Hr1G093240	0	unknown function
chr7H	580563012	11_21201	syn.	14, 17	chr7H	580561924	580564945	HORVU7Hr1G095220	0	unknown function
chr7H	610912783	12_10652	noncoding	15	chr7H	610910076	610913016	HORVU7Hr1G101920	0	(2R)-phospho-3-sulfolactate synthase-like
chr7H	642239467	11_21363	syn.	Longitude	chr7H	642238702	642243198	HORVU7Hr1G115780	0	30S ribosomal protein S5
chr7H	643843283	12_20241	noncoding	Longitude	chr7H	643842813	643843347	HORVU7Hr1G116630	0	undescribed protein
chrUn	18557985	12_20424	noncoding	elevation	chrUn	18554599	18558154	HORVU0Hr1G003890	0	Phosphoadenosine phosphosulfate reductase
chrUn	52769203	11_21191	noncoding	18	chrUn	52769083	52773359	HORVU0Hr1G008790	0	Protein CHAPERONE-LIKE PROTEIN OF POR1, chloroplastic
chr2H	13265795	SCRI_RS_150792	noncoding	18	chr2H	13265819	13270008	HORVU2Hr1G006330	25	Peptidase S24/S26A/S26B/S26C family protein
chr5H	471186968	SCRI_RS_157941	noncoding	8	chr5H	471187100	471189290	HORVU5Hr1G060210	133	sugar transporter 2
chr2H	539267692	SCRI_RS_125516	noncoding	19	chr2H	539267888	539271030	HORVU2Hr1G074740	197	COP9 signalosome complex subunit 8
chr4H	15544346	12_30793	noncoding	1, 8	chr4H	15544612	15553250	HORVU4Hr1G006750	267	Oxysterol-binding protein-related protein 1C
chr7H	56530284	SCRI_RS_157816	noncoding	Longitude	chr7H	56530601	56531455	HORVU7Hr1G029720	318	RING/U-box superfamily protein
chr2H	3116896	SCRI_RS_173486	noncoding	Latitude	chr2H	3117531	3118035	HORVU2Hr1G001490	636	Pentatricopeptide repeat-containing protein
chr4H	9697544	12_20618	noncoding	18, IC3	chr4H	9698627	9709684	HORVU4Hr1G004230	1084	Calcineurin-binding protein cabin-1
chr5H	652929697	SCRI_RS_235652	noncoding	15, 3	chr5H	652938504	652941439	NA	8808	NA
chr7H	144114452	SCRI_RS_152696	noncoding	16, 18, IC3	chr7H	144126991	144134701	NA	12540	NA
chr3H	627260285	SCRI_RS_192360	noncoding	2	chr3H	627359206	627366427	NA	98922	NA
chr2H	677845247	11_21175	noncoding	14, 17	chr2H	677953114	677954585	NA	107868	NA
chr7H	361292924	SCRI_RS_219749	noncoding	1, 11, 6, IC1	chr7H	361405464	361419175	NA	112541	NA
